# Supplementary material
Source: Springer Nature journal article supplement (https://www.springermedizin.de/resource/supplementary/12885_2013_3987_MOESM3_ESM.pdf/9464842)

**A**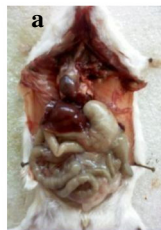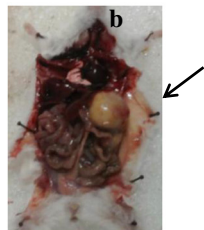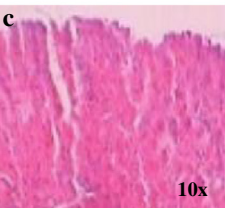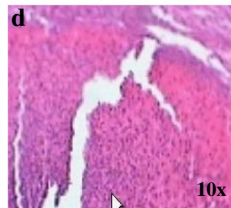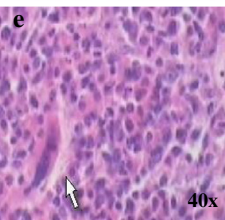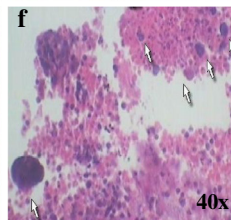**Untreated**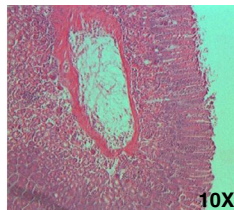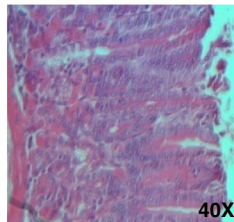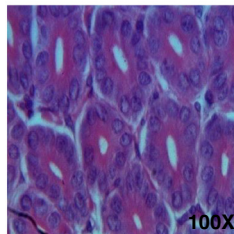**Normal****RAN 300d**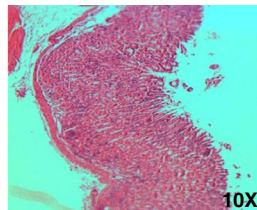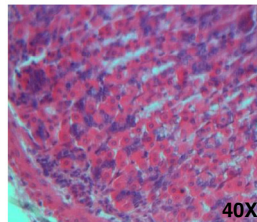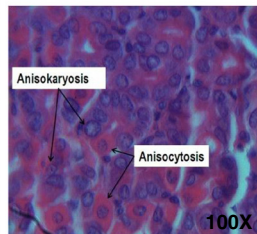**Dysplasia****RAN+Lime 300d**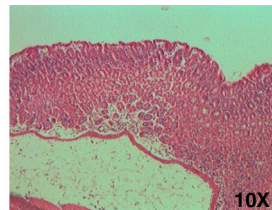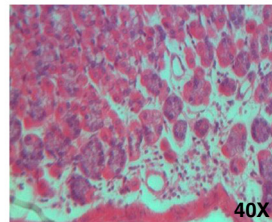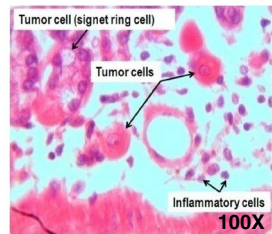**Carcinoma**

Supplement: MOESM3 [file 9464842]
